# Supplementary material for: Using Spatial Regression to Model Potentially Toxic Metal (PTM) Mobility Based on Physicochemical Soil Properties
Source: Hindawi journal article supplement (doi:10.1155/2019/6432571), 2019-08-04
Supplement: f1 [file 6432571.f1.xlsx]

## Sheet: Sheet1
Zinc											Manganese											Copper											Lead											Cadmium
	Threshold: 0.00148708			Threshold: 0.002			Threshold: 0.003					Threshold: 0.00148708			Threshold: 0.002			Threshold: 0.003					Threshold: 0.00148708			Threshold: 0.002			Threshold: 0.003					Threshold: 0.00148708			Threshold: 0.002			Threshold: 0.003					Threshold: 0.00148708			Threshold: 0.002
	OLS	SLag	SError	OLS	SLag	SError	OLS	SLag	SError			OLS	SLag	SError	OLS	SLag	SError	OLS	SLag	SError			OLS	SLag	SError	OLS	SLag	SError	OLS	SLag	SError			OLS	SLag	SError	OLS	SLag	SError	OLS	SLag	SError			OLS	SLag	SError	OLS	SLag
Constant	-12966.9 (0.16936)	-11589.5 (0.17397)	-11449.5 (0.15865)	-12966.9 (0.16936)	-13149 (0.12643)	-12427.7 (0.14247)	-12966.9 (0.16936)	-12649.6 (0.14021)	-12279.6 (0.14821)		Constant	25339.7 (0.15123)	23207.9 (0.14305)	24289.4 (0.12919)	25339.7 (0.15123)	26965 (0.09309)	26459.1 (0.08559)	25339.7 (0.15123)	27830.2 (0.07970)	23315.9 (0.11807)		Constant	801.994 (0.01162)	807.597 (0.00420)	789.01 (0.00466)	801.994 (0.01162)	803.481 (0.00460)	848.616 (0.00267)	801.994 (0.01162)	793.723 (0.00538)	807.141 (0.00414)		Constant	-11345.6 (0.30238)	-7515.78 (0.40114)	-5699.37 (0.42618)	-11345.6 (0.30238)	-11428.8 (0.25209)	-12412 (0.18394)	-11345.6 (0.30238)	-11474.1 (0.25093)	-10803.9 (0.25464)		Constant	200.672 (0.04919)	229.942 (0.00734)	188.208 (0.02692)	200.672 (0.04919)	220.739 (0.01331)
Moisture_Content%2	3.11644 (0.46519)	2.89881 (0.45172)	2.53697 (0.48291)	3.11644 (0.46519)	3.13287 (0.42070)	3.00718 (0.43415)	3.11644 (0.46519)	3.07266 (0.43003)	2.98476 (0.43977)		Moisture_Content%2	-15.6653 (0.05385)	-15.0088 (0.03747)	-15.2864 (0.03952)	-15.6653 (0.05385)	-16.108 (0.02713)	-15.5769 (0.02388)	-15.6653 (0.05385)	-17.1396 (0.01745)	-17.1063 (0.01042)		Moisture_Content%2	-	-	-	-	-	-	-	-	-		Moisture_Content%2	-	-	-	-	-	-	-	-	-		Moisture_Content%2	-	-	-	-	-
Bulk_Density%2	-283.378 (0.39959)	-265.56 (0.38124)	-204.196 (0.48847)	-283.378 (0.39959)	-282.013 (0.35765)	-284.93 (0.35013)	-283.378 (0.39959)	-289.669 (0.34597)	-289.584 (0.34220)		Bulk_Density%2	527.715 (0.40137)	584.732 (0.30063)	605.223 (0.28999)	527.715 (0.40137)	535.029 (0.34871)	510.979 (0.35931)	527.715 (0.40137)	538.231 (0.34054)	625.074 (0.24711)		Bulk_Density%2	-	-19.1414 (0.05620)	-19.2001 (0.05548)	-	-19.4424 (0.05303)	-	-	-	-		Bulk_Density%2	-	-	-	-	-	-	-	-	-		Bulk_Density%2	-	-	-	-	-
BL_pH_2	189.781 (0.02784)	192.908 (0.01123)	188.132 (0.00721)	189.781 (0.02784)	189.699 (0.01357)	187.875 (0.01317)	189.781 (0.02784)	189.202 (0.01370)	186.636 (0.01461)		BL_pH_2	134.376 (0.39356)	127.528 (0.36734)	119.186 (0.42203)	134.376 (0.39356)	139.927 (0.32764)	146.003 (0.28310)	134.376 (0.39356)	160.691 (0.25586)	231.377 (0.08439)		BL_pH_2	-	-	-	-	-	-	-	-	-		BL_pH_2	402.577 (0.00016)	510.856 (0.00000)	392.071 (0.00000)	402.577 (0.00016)	416.045 (0.00001)	403.326 (0.00000)	402.577 (0.00016)	402.414 (0.00001)	386.029 (0.00001)		BL_pH_2	4.11406 (0.00003)	4.70159 (0.00000)	3.62728 (0.00000)	4.11406 (0.00003)	4.48632 (0.00000)
Total Exchange Capacity (meq/100 g)	-68.1672 (0.00023)	-67.923 (0.00001)	-69.7335 (0.00000)	-68.1672 (0.00023)	-68.2496 (0.00001)	-68.447 (0.00001)	-68.1672 (0.00023)	-68.1763 (0.00001)	-68.3543 (0.00001)		Total Exchange Capacity (meq/100 g)	-22.8799 (0.47526)	-23.2452 (0.41994)	-22.3165 (0.44255)	-22.8799 (0.47526)	-23.1585 (0.42678)	-20.88 (0.47238)	-22.8799 (0.47526)	-26.8269 (0.35193)	-39.4019 (0.16173)		Total Exchange Capacity (meq/100 g)	-	-	-	-	-	-	-	-	-		Total Exchange Capacity (meq/100 g)	-	32.5643 (0.05146)	29.9258 (0.02816)	-	-	-	-	-	-		Total Exchange Capacity (meq/100 g)	-	-	-	-	-
BL_Organic Matter%	16.9527 (0.25190)	18.4774 (0.16482)	21.2128 (0.10480)	16.9527 (0.25190)	16.8661 (0.20918)	17.6204 (0.19012)	16.9527 (0.25190)	16.8869 (0.20907)	17.1021 (0.20487)		BL_Organic Matter%	24.9708 (0.36527)	24.0871 (0.33123)	25.5586 (0.30361)	24.9708 (0.36527)	27.6267 (0.27132)	30.0889 (0.22901)	24.9708 (0.36527)	29.5444 (0.23424)	33.6834 (0.18657)		BL_Organic Matter%	-	-	-	-	-	-	-	-	-		BL_Organic Matter%	-	-	-	-	-	-	-	-	-		BL_Organic Matter%	-	-	-	-	-
%Sand2	13111 (0.16675)	11718.8 (0.17114)	11480.4 (0.15897)	13111 (0.16675)	13287.8 (0.12405)	12584 (0.13923)	13111 (0.16675)	12819 (0.13633)	12451.4 (0.14463)		%Sand2	-25991.8 (0.14308)	-23971.5 (0.13198)	-24981.8 (0.12071)	-25991.8 (0.14308)	-27621.2 (0.08672)	-27209.2 (0.07799)	-25991.8 (0.14308)	-28476.8 (0.07392)	-24543.5 (0.10223)		%Sand2	-756.615 (0.01734)	-761.727 (0.00718)	-743.355 (0.00796)	-756.615 (0.01734)	-756.98 (0.00787)	-806.007 (0.00456)	-756.615 (0.01734)	-749.565 (0.00875)	-763.136 (0.00696)		%Sand2	-	-	-	-	-	-	-	-	-		%Sand2	-208.563 (0.04221)	-238.304 (0.00569)	-196.248 (0.02145)	-208.563 (0.04221)	-228.305 (0.01077)
%Silt2	9518.69 (0.36864)	8037.79 (0.40263)	7562.74 (0.40380)	9518.69 (0.36864)	9712.25 (0.31564)	8781.54 (0.35728)	9518.69 (0.36864)	9200.16 (0.34046)	8655.71 (0.36525)		%Silt2	-33852 (0.09098)	-31093.3 (0.08286)	-32450.6 (0.07441)	-33852 (0.09098)	-35874.1 (0.04816)	-35268 (0.04006)	-33852 (0.09098)	-36811.4 (0.04032)	-31411.6 (0.05491)		%Silt2	-1106.21 (0.00243)	-1112.88 (0.00048)	-1090.78 (0.00052)	-1106.21 (0.00243)	-1104.15 (0.00055)	-1165.24 (0.00028)	-1106.21 (0.00243)	-1097.6 (0.00064)	-		%Silt2	-	-	-	-	-	-	-	-	-		%Silt2	-244.728 (0.03427)	-277.105 (0.00414)	-232.87 (0.01372)	-244.728 (0.03427)	-264.376 (0.00839)
W_Zn	-	-0.148973 (0.36144)	-	-	0.0197529 (0.92661)	-	-	-0.0466535 (0.89089)	0.00000 (0.00000)		W_Mn	-	0.186222 (0.23836)	-	-	-0.130456 (0.57875)	-	-	-0.379805 (0.31510)	-		W_Pb	-	-0.0694428 (0.66340)	-	-	-0.0902254 (0.67917)	-	-	0.0653627 (0.82657)	-1112.85 (0.00049)		W_Pb	-	-0.471766 (0.00197)	-	-	-0.0905873 (0.66257)	-	-	-0.0917134 (0.75125)	-		W_BL_Cu___mg	-	-0.375697 (0.01430)	-	-	-0.33568 (0.09844)
LAMBDA	-	-	-0.251636 (0.17100)	-	-	-0.0657679 (0.78830)	-	-	-0.0774361 (0.83254)		LAMBDA	-	-	0.140434 (0.40846)	-	-	-0.251607 (0.33076)	-	-	-0.689846 (0.12710)		LAMBDA	-	-	-0.0418736 (0.81678)	-	-	0.1154 (0.60818)	-	-	0.0942127 (0.77555)		LAMBDA	-	-	-0.747823 (0.00000)	-	-	-0.421649 (0.11226)	-	-	-0.577793 (0.19026)		LAMBDA	-	-	-0.331081 (0.06915)	-	-
Statistics:											Statistics:											Statistics:											Statistics:											Statistics:
R2	0.371236	0.384256	0.400225	0.371236	0.371373	0.372277	0.371236	0.371529	0.371864		R2	0.162181	0.185278	0.17439	0.162181	0.168278	0.180844	0.162181	0.186054	0.212389		R2	0.365909	0.369889	0.366947	0.365909	0.368972	0.369361	0.365909	0.366592	0.366935		R2	0.501037	0.601719	0.693909	0.501037	0.503224	0.527766	0.501037	0.502307	0.521976		R2	0.558144	0.616658	0.587414	0.558144	0.587524
Adjusted R2	0.271205	-	-	0.271205	-	-	0.271205	-	-		Adjusted R2	0.028892	-	-	0.028892	-	-	0.028892	-	-		Adjusted R2	0.265031	-	-	0.265031	-	-	0.265031	-	-		Adjusted R2	0.421657	-	-	0.421657	-	-	0.421657	-	-		Adjusted R2	0.487849	-	-	0.487849	-
AIC	762.255	763.487	760.706	762.255	764.247	762.205	762.255	764.239	762.226		AIC	827.317	828.397	826.853	827.317	829.078	826.656	827.317	828.315	825.638		AIC	406.895	406.729	406.835	406.895	408.711	406.729	406.895	408.856	406.847		AIC	778.714	772.178	762.513	778.714	780.554	777.244	778.714	780.613	777.589		AIC	290.25	286.875	288.248	290.25	289.567
p-value	0.00308126	-	-	0.00308126	-	-	0.00308126	-	-		p-value	0.314046	-	-	0.314046	-	-	0.314046	-	-		p-value	0.00359351	-	-	0.00359351	-	-	0.00359351	-	-		p-value	3.72951e-05	-	-	3.72951e-05	-	-	3.72951e-05	-	-		p-value	3.29435e-06	-	-	3.29435e-06	-
Breusch-Pagan test	14.6775 (0.04036)	14.4504 (0.04373)	13.6179 (0.05841)	14.6775 (0.04036)	14.6084 (0.04136)	14.5503 (0.04222)	14.6775 (0.04036)	14.7102 (0.03990)	14.5464 (0.04227)		Breusch-Pagan test	17.7959 (0.01293)	18.368 (0.01042)	18.8747 (0.00859)	17.7959 (0.01293)	17.9175 (0.01235)	17.4349 (0.01480)	17.7959 (0.01293)	17.1138 (0.01668)	17.1412 (0.01651)		Breusch-Pagan test	14.5642 (0.04201)	14.6619 (0.04059)	14.8479 (0.03800)	14.5642 (0.04201)	14.2342 (0.04717)	14.0484 (0.05033)	14.5642 (0.04201)	14.7089 (0.03992)	14.5536 (0.04217)		Breusch-Pagan test	47.9093 (0.00000)	35.5038 (0.00001)	34.7261 (0.00001)	47.9093 (0.00000)	45.5195 (0.00000)	41.7913 (0.00000)	47.9093 (0.00000)	47.5855 (0.00000)	48.2659 (0.00000)		Breusch-Pagan test	86.5684 (0.00000)	57.2267 (0.00000)	73.8945 (0.00000)	86.5684 (0.00000)	70.7193 (0.00000)
Likelihood Ratio Test	-	0.7683 (0.38074)	1.5496 (0.21319)	-	0.0080 (0.92892)	0.0498 (0.82343)	-	0.0159 (0.89977)	0.0290 (0.86471)		Likelihood Ratio Test	-	0.9194 (0.33762)	0.4635 (0.49601)	-	0.2388 (0.62508)	0.6608 (0.41629)	-	1.0014 (0.31696)	1.6786 (0.19511)		Likelihood Ratio Test	-	0.2572 (0.61204)	0.0596 (0.80718)	-	0.1837 (0.66821)	0.1654 (0.68424)	-	0.0388 (0.84391)	0.0478 (0.82693)		Likelihood Ratio Test	-	8.5362 (0.00348)	16.2009 (0.00006)	-	0.1597 (0.68943)	1.4700 (0.22534)	-	0.1004 (0.75133)	1.1252 (0.28881)		Likelihood Ratio Test	-	5.3754 (0.02042)	2.0018 (0.15712)	-	2.6830 (0.10143)
Jarque-Bera	7.3986 (0.02474)	-	-	7.3986 (0.02474)	-	-	7.3986 (0.02474)	-	-		Jarque-Bera	51.8114 (0.00000)	-	-	51.8114 (0.00000)	-	-	51.8114 (0.00000)	-	-		Jarque-Bera	55.8858 (0.00000)	-	-	55.8858 (0.00000)	-	-	55.8858 (0.00000)	-	-		Jarque-Bera	23.4105 (0.00001)	-	-	23.4105 (0.00001)	-	-	23.4105 (0.00001)	-	-		Jarque-Bera	42.3162 (0.00000)	-	-	42.3162 (0.00000)	-
SPATIAL DIAGNOSTICS 0.00148708											SPATIAL DIAGNOSTICS 0.00148708											SPATIAL DIAGNOSTICS 0.00148708											SPATIAL DIAGNOSTICS 0.00148708											SPATIAL DIAGNOSTICS 0.00148708
TEST	MI/DF	VALUE	PROB								TEST	MI/DF	VALUE	PROB								TEST	MI/DF	VALUE	PROB								TEST	MI/DF	VALUE	PROB								TEST	MI/DF	VALUE	PROB
Moran's I (error)	-0.1379	-0.8619	0.38875								Moran's I (error)	0.0405	0.8993	0.36847								Moran's I (error)	-0.0150	0.3512	0.72543								Moran's I (error)	-0.3753	-3.2057	0.00135								Moran's I (error)	-0.1119	-0.6052	0.54507
Lagrange Multiplier (lag)	1	0.8058	0.36938								Lagrange Multiplier (lag)	1	0.3115	0.57675								Lagrange Multiplier (lag)	1	0.2477	0.61872								Lagrange Multiplier (lag)	1	9.6505	0.00189								Lagrange Multiplier (lag)	1	4.6791	0.03053
Robust LM (lag)	1	0.1973	0.6569								Robust LM (lag)	1	0.4332	0.51041								Robust LM (lag)	1	0.6476	0.42098								Robust LM (lag)	1	0.0027	0.95839								Robust LM (lag)	1	6.892	0.00866
Lagrange Multiplier (error)	1	1.5787	0.20895								Lagrange Multiplier (error)	1	0.136	0.71232								Lagrange Multiplier (error)	1	0.0188	0.89099								Lagrange Multiplier (error)	1	11.6919	0.00063								Lagrange Multiplier (error)	1	1.0395	0.30793
Robust LM (error)	1	0.9703	0.32461								Robust LM (error)	1	0.2577	0.61171								Robust LM (error)	1	0.4187	0.51759								Robust LM (error)	1	2.0441	0.1528								Robust LM (error)	1	3.2524	0.07132
Lagrange Multiplier (SARMA)	2	1.776	0.41147								Lagrange Multiplier (SARMA)	2	0.5692	0.75231								Lagrange Multiplier (SARMA)	2	0.6664	0.71664								Lagrange Multiplier (SARMA)	2	11.6946	0.00289								Lagrange Multiplier (SARMA)	2	7.9315	0.01895
SPATIAL DIAGNOSTICS 0.002											SPATIAL DIAGNOSTICS 0.002											SPATIAL DIAGNOSTICS 0.002											SPATIAL DIAGNOSTICS 0.002											SPATIAL DIAGNOSTICS 0.002
TEST	MI/DF	VALUE	PROB								TEST	MI/DF	VALUE	PROB								TEST	MI/DF	VALUE	PROB								TEST	MI/DF	VALUE	PROB								TEST	MI/DF	VALUE	PROB
Moran's I (error)	0.0068	0.6818	0.49539								Moran's I (error)	-0.1085	-0.9600	0.33704								Moran's I (error)	0.0493	1.2866	0.19823								Moran's I (error)	-0.0404	0.0094	0.9925								Moran's I (error)	-0.0226	0.2631	0.79247
Lagrange Multiplier (lag)	1	0.045	0.83198								Lagrange Multiplier (lag)	1	1.2268	0.26802								Lagrange Multiplier (lag)	1	0.0611	0.80482								Lagrange Multiplier (lag)	1	0.0465	0.82927								Lagrange Multiplier (lag)	1	1.5194	0.21771
Robust LM (lag)	1	0.106	0.7448								Robust LM (lag)	1	0.1332	0.71515								Robust LM (lag)	1	2.7348	0.09818								Robust LM (lag)	1	0.1185	0.73069								Robust LM (lag)	1	2.7788	0.09552
Lagrange Multiplier (error)	1	0.0067	0.93484								Lagrange Multiplier (error)	1	1.6782	0.19517								Lagrange Multiplier (error)	1	0.3471	0.55577								Lagrange Multiplier (error)	1	0.2326	0.62964								Lagrange Multiplier (error)	1	0.0726	0.7876
Robust LM (error)	1	0.0676	0.79482								Robust LM (error)	1	0.5845	0.44455								Robust LM (error)	1	3.0209	0.0822								Robust LM (error)	1	0.3045	0.58105								Robust LM (error)	1	1.332	0.24844
Lagrange Multiplier (SARMA)	2	0.1126	0.94524								Lagrange Multiplier (SARMA)	2	1.8113	0.40427								Lagrange Multiplier (SARMA)	2	3.0819	0.21418								Lagrange Multiplier (SARMA)	2	0.351	0.83902								Lagrange Multiplier (SARMA)	2	2.8514	0.24034
SPATIAL DIAGNOSTICS 0.003											SPATIAL DIAGNOSTICS 0.003											SPATIAL DIAGNOSTICS 0.003											SPATIAL DIAGNOSTICS 0.003											SPATIAL DIAGNOSTICS 0.003
TEST	MI/DF	VALUE	PROB								TEST	MI/DF	VALUE	PROB								TEST	MI/DF	VALUE	PROB								TEST	MI/DF	VALUE	PROB								TEST	MI/DF	VALUE	PROB
Moran's I (error)	-0.0039	0.6341	0.52603								Moran's I (error)	-0.0601	-0.6976	0.48544								Moran's I (error)	0.0121	1.1031	0.31102								Moran's I (error)	-0.0315	-0.0197	0.98429								Moran's I (error)	-0.0797	-1.1604	0.24587
Lagrange Multiplier (lag)	1	0.0463	0.82955								Lagrange Multiplier (lag)	1	1.2551	0.26258								Lagrange Multiplier (lag)	1	0.0803	0.77694								Lagrange Multiplier (lag)	1	0.00555	0.81383								Lagrange Multiplier (lag)	1	0.1092	0.74111
Robust LM (lag)	1	0.2557	0.6131								Robust LM (lag)	1	0.1664	0.68332								Robust LM (lag)	1	0.0418	0.83806								Robust LM (lag)	1	0.0699	0.79146								Robust LM (lag)	1	0.8886	0.34586
Lagrange Multiplier (error)	1	0.0045	0.94644								Lagrange Multiplier (error)	1	1.0887	0.29676								Lagrange Multiplier (error)	1	0.0444	0.83315								Lagrange Multiplier (error)	1	0.2986	0.58475								Lagrange Multiplier (error)	1	1.9119	0.16675
Robust LM (error)	1	0.2139	0.64376								Robust LM (error)	1	0	0.99556								Robust LM (error)	1	0.0059	0.93885								Robust LM (error)	1	0.3131	0.5758								Robust LM (error)	1	2.6914	0.10089
Lagrange Multiplier (SARMA)	2	0.2602	0.87801								Lagrange Multiplier (SARMA)	2	1.2551	0.53389								Lagrange Multiplier (SARMA)	2	0.0861	0.95784								Lagrange Multiplier (SARMA)	2	0.3685	0.83172								Lagrange Multiplier (SARMA)	2	2.8005	0.24653
[truncated: 4 more columns]
